# Supplementary material
Source: publisher figshare collection journal article supplement (https://frontiersin.figshare.com/ndownloader/files/14982806)
Supplement: Supplementary file [file 14982806]

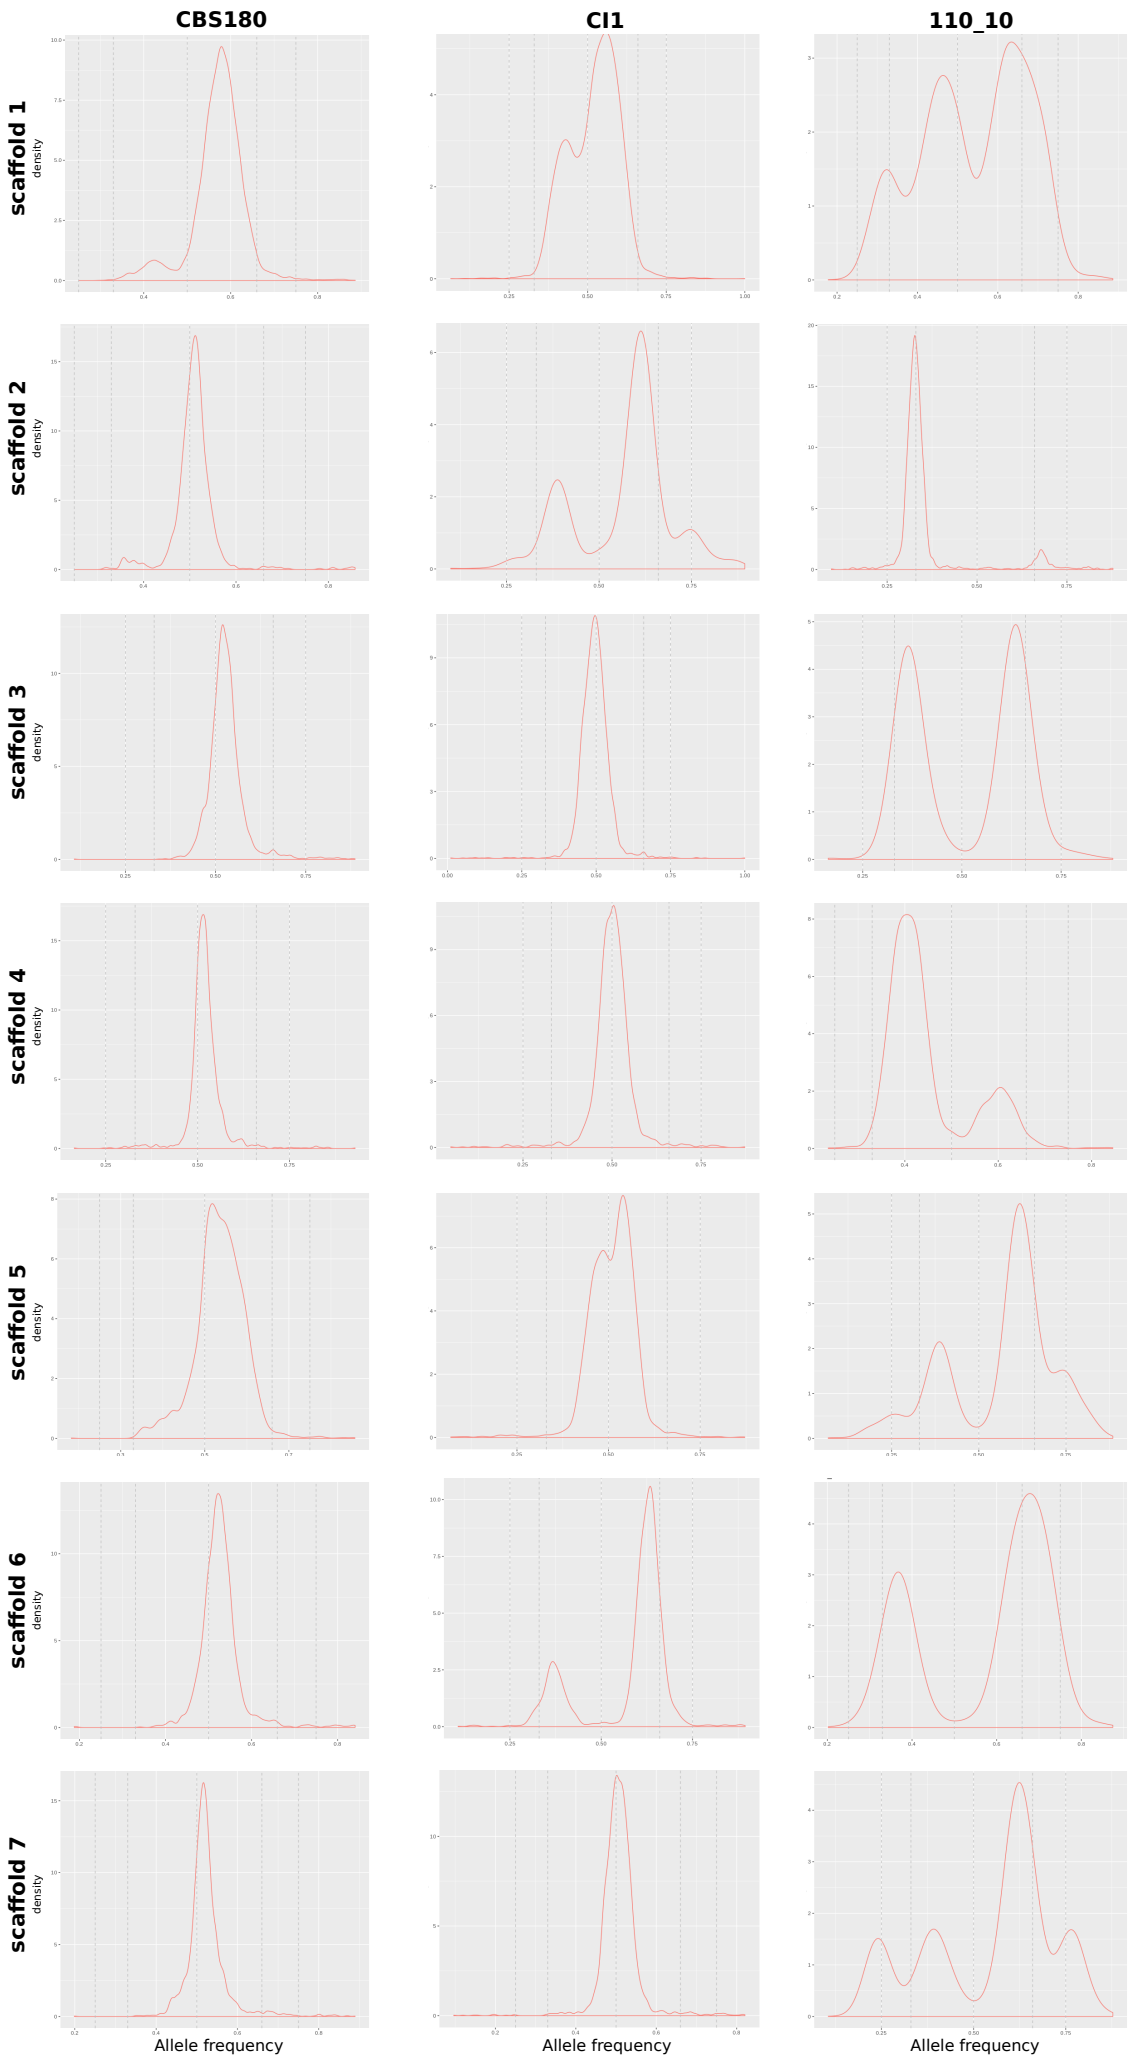

**Supplementary Fig7.** Density of the allele frequency in seven scaffolds of *C. inconspicua*. Results for two mainly diploid strains (CI1 - clade 1, and CBS180 - clade 2) and for a strain with ambiguous ploidy level (110\_10) are shown. Each row represents a different scaffold, and each column a different strain.
